# Supplementary material for: Neural indicators of perceptual variability of pain across species
Source: PubMed Central journal article supplement (PMC6358671; doi:10.1073/pnas.1812499116), 2019-01-14
Supplement: pnas.1812499116.sapp.pdf [file pnas.1812499116.sapp.pdf]

## 1 **Supplemental Information**

2

### 3 *Supplemental methods (Experiments 1, 2, 3)*

#### 4 *Time-frequency decomposition (TFD)*

5 A TFD of the EEG signal was obtained using a windowed Fourier transform (WFT) with a fixed  
6 250-ms Hanning window. The WFT yielded, for each EEG epoch, a complex time-frequency  
7 estimate  $F(t, f)$  at each point  $(t, f)$  of the time-frequency plane, extending from -500 to 1,000  
8 ms (in steps of 1 ms) in the time domain, and from 1 to 100 Hz (in steps of 1 Hz) in the  
9 frequency domain. The resulting spectrogram,  $P(t, f) = |F(t, f)|^2$ , represents the signal power as a  
10 joint function of time and frequency at each time-frequency point. The spectrograms were  
11 baseline-corrected (reference interval: -400 to -100 ms relative to stimulus onset) at each  
12 frequency  $f$  using the *subtraction* approach, which avoids the positive bias introduced by the  
13 *percentage* approach (1). This reference interval was chosen to reduce the adverse influence of  
14 spectral estimates biased by windowing post-stimulus activity and padding values.

15

#### 16 *Point-by-point statistical analyses*

17 The point-by-point statistical analyses were composed of the following steps:

18 Step 1. We tested whether the brain responses both in the time domain and time-frequency  
19 domain within the post-stimulus interval were significantly different from those within the pre-  
20 stimulus interval by performing a bootstrapping test (2). At each time point  $(t)$  or time-frequency  
21 point  $(t, f)$ , we extracted a collection of numerical samples from the 96 subjects, and compared  
22 with a similar collection of numerical samples from the baseline interval. The null hypothesis

1 was that there was no difference between the means of the two samples, i.e., no difference  
2 between the mean magnitude values in pre-stimulus and post-stimulus intervals. The pseudo-t  
3 statistic of two populations was calculated, and its probability distribution was estimated by  
4 permutation testing (5,000 times). After obtaining the distribution of the pseudo-t statistics from  
5 the baseline, we calculated the bootstrap p values for the null hypothesis. This procedure  
6 identified the time intervals or time-frequency regions in which the brain responses were  
7 significantly different relative to the baseline interval. To account for multiple comparisons  
8 across time and frequency, the significance level (expressed as p value) was corrected using an  
9 FDR procedure (3).

10  
11 Step 2. To identify time intervals or time-frequency regions whose magnitude reflected the  
12 within-subject variability of pain ratings, we performed, in each subject, a point-by-point linear  
13 correlation analysis between single-trial magnitudes and the corresponding single-trial ratings of  
14 pain perception. The obtained correlation coefficient was transformed to z values using the Fisher  
15 r-to-z transformation. z values from all subjects were finally compared against zero using a one-  
16 sample t-test.

17  
18 Step 3. To identify time intervals or time-frequency regions whose magnitude reflected the  
19 between-subject variability of pain ratings, we performed a point-by-point linear correlation  
20 analysis between single-subject average magnitudes and the corresponding single-subject average  
21 pain ratings.

22

1 Step 4. To account for the multiple comparison problem in the point-by-point analyses described  
2 in steps 2 and 3, significant time points or time-frequency pixels were categorized in clusters  
3 based on their adjacency in the time domain or time-frequency domain (cluster-level statistical  
4 analysis) (4). Specifically, to explore whether the ' $\gamma$ -ERS' region was able to reflect both within-  
5 subject and between-subject pain variability, we defined a *conjunct* ' $\gamma$ -ERS' cluster based on the  
6 following three criteria: (1) the cluster had to show a significant magnitude difference compared  
7 to the pre-stimulus interval (this was assessed using the bootstrapping test described in Step 1);  
8 (2) the magnitude of the cluster had to show a significant correlation with single-trial pain ratings  
9 (this was assessed using the point-by-point within-subject correlation analysis described in Step  
10 2), as well as a significant correlation with single-subject pain ratings (this was assessed using  
11 the point-by-point between-subject correlation analysis described in Step 3); (3) only the cluster  
12 with the largest number of significant time-frequency pixels in the  $\gamma$ -frequency band (30-100 Hz)  
13 was selected to control for false-positive observations (4).

14  
15 Step 5. To confirm the relationship between the magnitude of ' $\gamma$ -ERS' and pain ratings within  
16 conjunct ' $\gamma$ -ERS' cluster, we randomly permuted 5,000 times the TFDs (5). Within-subject and  
17 between-subject correlation analyses were performed at each time-frequency point of each cluster  
18 in each permutation, thus yielding two cluster-level statistics (t-values and r-values respectively).  
19 Distributions of the cluster-level permutation t-statistics/r-statistics were obtained, and the two-  
20 tailed p values were respectively derived by locating the observed t value and r value under the  
21 estimated permutation distribution.

22

1 For display purposes, we measured the magnitudes of ' $\gamma$ -ERS' of each trial and subject by  
2 computing the top 20% of all time-frequency points within the conjunct ' $\gamma$ -ERS' cluster, and  
3 showed their correlations with pain ratings at both within-subject and between-subject levels.  
4

5 *Exploring the interactions of within-subject and between-subject effects*

6 To identify the response features reflecting *within-subject* and *between-subject* pain variability,  
7 the 96 single subjects were first sorted by their mean pain intensity ratings across trials. Two  
8 subgroups reflecting low-pain and high-pain subjects were defined by median split.  
9 Subsequently, single trials of each subject were sorted by reported pain intensity. The first and  
10 the last 20 trials, respectively reflecting the low-pain and the high-pain brain responses, were  
11 averaged time-locked to stimulus onset. This procedure yielded, in each subject (belonging to  
12 either the low-pain or the high-pain subgroup), two average waveforms, one reflecting low-pain  
13 trials, and the other reflecting high-pain trials.  
14

15 Baseline-to-peak amplitudes of N1, N2, and P2 waves were measured in the two average  
16 waveforms of each subject (N1: C4-Fz; N2 and P2: Cz-nose) (6). These amplitude values were  
17 compared using a two-way mixed-designed ANOVA, with a within-subject factor 'trial type'  
18 (two levels: low-pain trials, high-pain trials) and a between-subject factor 'subject type' (two  
19 levels: low-pain subjects, high-pain subjects).  
20

21 In the time-frequency domain, baseline corrected TFDs of low-pain and high-pain trials were  
22 averaged in each subject, yielding, in each subject, two average TFDs, one reflecting low-pain  
23 trials and the other reflecting high-pain trials. According to previous publications (1, 7, 8), the

1 magnitudes of three laser-elicited time-frequency features ('LEP', ' $\alpha$ -ERD', and ' $\gamma$ -ERS') of low-  
2 pain and high-pain trials were measured in each subject by computing the top 20% of all time-  
3 frequency points within their respective time-frequency regions-of-interest (TF-ROIs), at Cz-  
4 nose: 'LEP' (100-400 ms, 1-10 Hz), ' $\alpha$ -ERD' (600-900 ms, 7-13 Hz), and ' $\gamma$ -ERS' (180-260 ms,  
5 60-85 Hz) (9). The estimated magnitudes were compared using the same two-way mixed-design  
6 ANOVA used to explore the effects of 'trial type' and 'subject type' in the time domain analysis.

7

#### 8 *Controlling for bias introduced by differences in response sensitivity*

9 The features of the EEG response elicited by laser stimuli ('LEP', ' $\alpha$ -ERD', and ' $\gamma$ -ERS') were  
10 first normalized (expressed as a z-score) and then compared using a three-way mixed-design  
11 ANOVA, with two within-subject factors ('trial category': low-pain and high-pain trials; 'feature  
12 category': 'LEP', ' $\alpha$ -ERD', and ' $\gamma$ -ERS'), and a between-subject factor ('subject category': low-  
13 pain and high-pain subjects). When the interaction was significant, post-hoc pair-wise  
14 comparisons were performed.

15

16

#### 17 ***Supplemental results***

##### 18 *Describing within-subject pain variability*

19 To assess this within-subject variability, we first sorted trials by reported pain intensity in each  
20 individual, and median-split the trials into high-pain and low-pain subgroups.

21

1 Virtually all features of the EEG response elicited by laser stimuli, both in the time domain and  
2 in the time-frequency domain, reflected within-subject pain reports. Here we also median-split  
3 the EEG cohort into high-pain and low-pain trials, as above (Figure S1A). The peak amplitude of  
4 all main EEG waves in the time domain (i.e., N1 wave: 120-200 ms; N2 wave: 180-300 ms; P2  
5 wave: 250-500 ms; Figure S1B), as well as the magnitude of stimulus-induced modulations of  
6 EEG oscillations (i.e., 'LEP': 100-400 ms, 1-10 Hz; ' $\alpha$ -ERD': 600-900 ms, 7-13 Hz; ' $\gamma$ -ERS': 180-  
7 260 ms, 60-85 Hz; Figure S1C) were significantly higher in high-pain trials ( $7.5 \pm 1.0$ ) than in  
8 low-pain trials ( $4.1 \pm 1.0$ ) (Figure S1A). Similar results were obtained when subjective pain  
9 ratings were tripartite in low-third, middle-third, and high-third trials.

10

#### 11 *Describing between-subject pain variability*

12 To assess the between-subject variability, we used the same data but this time sorted the  
13 individuals by their mean self-reported pain ratings across all trials. This analysis gives the  
14 relative range of the pain scale each individual used. We then median-split the individuals into  
15 high-pain and low-pain subgroups. We found clear differences in the mean ratings of pain  
16 sensitivity between subgroups: they were  $4.9 \pm 0.6$  and  $6.6 \pm 0.5$ , respectively (Figure S1D).

17

18 We next asked whether neural activity could predict this between-subject variability, as it did in  
19 the within-subject analysis. In contrast to the within-subject analysis, we found that variability  
20 across different individuals was largely not reflected in the neural responses. Almost all explored  
21 features of the EEG responses that accurately reflected subjective pain reports at within-subject  
22 level failed to reflect the pain sensitivity across different individuals (Figure S1E&F). The only  
23 notable exception was the ' $\gamma$ -ERS', whose activity was reliably and significantly larger in the

1 high-pain than in the low-pain subjects (Figure S1F). Similar results were obtained when  
2 subjective pain ratings were tripartite in low-third, middle-third, and high-third subjects.

3

Within-subject comparison

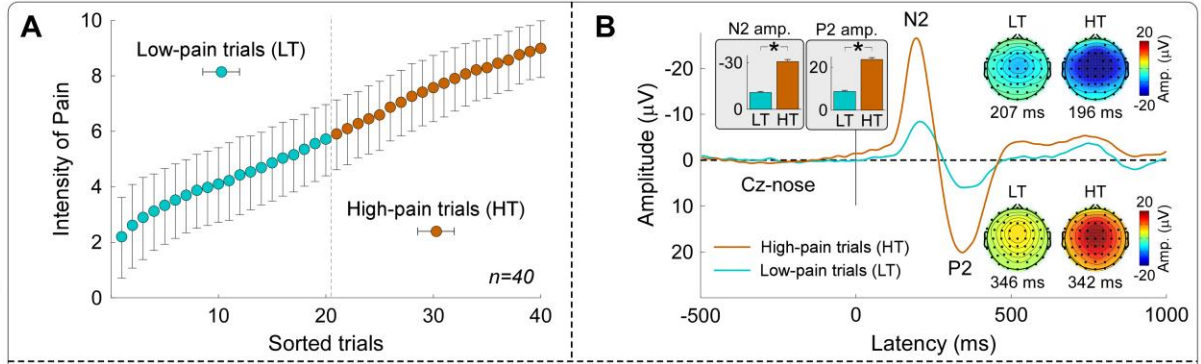

Between-subject comparison

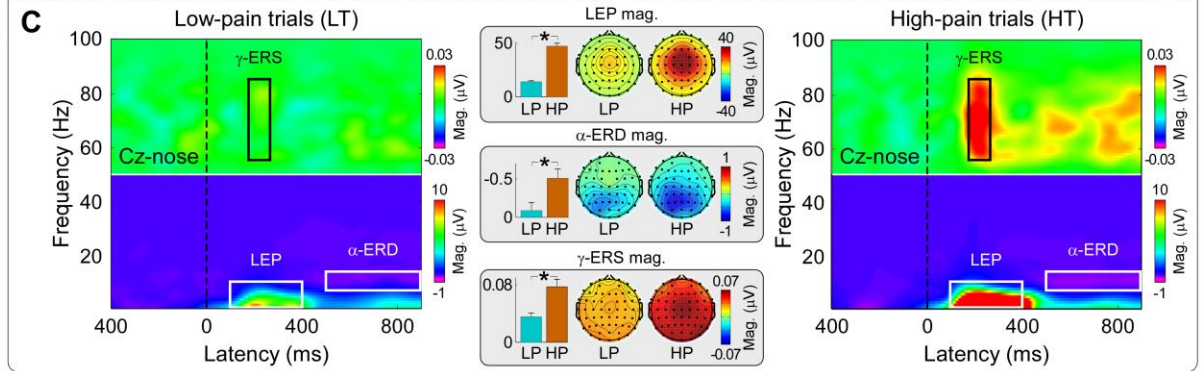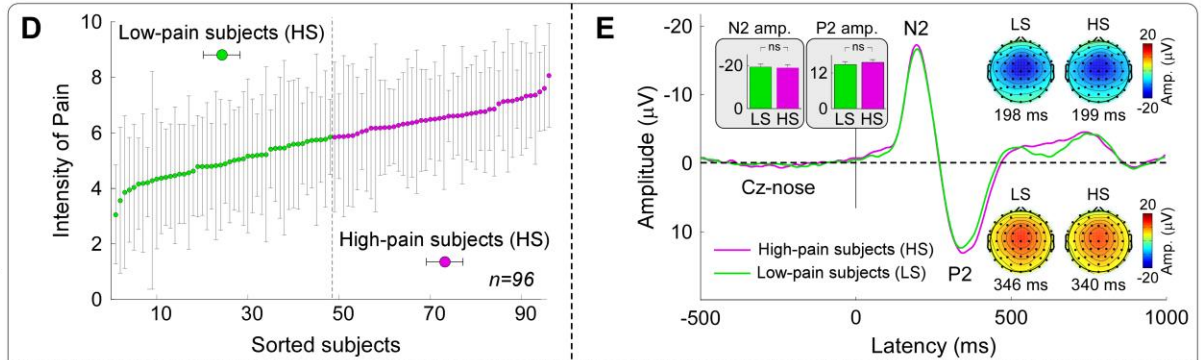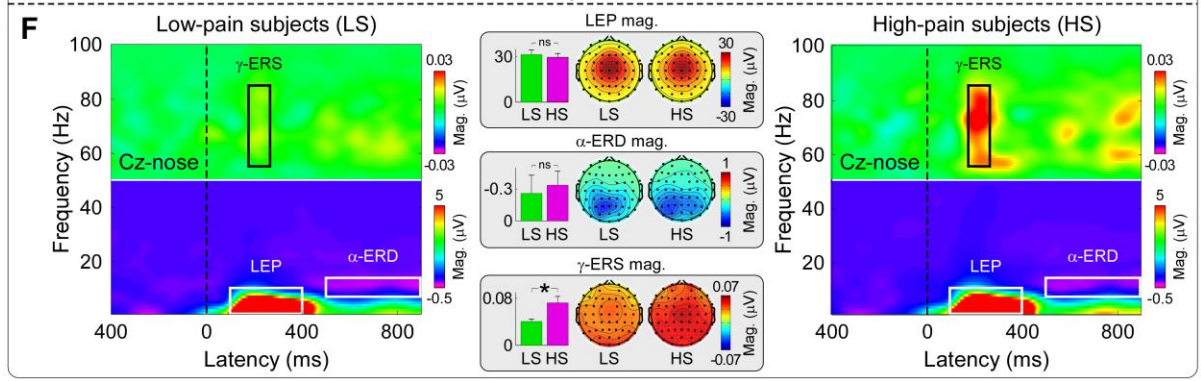

1  
2



1 **Figure S1.** Electrophysiological indicators of within-subject and between-subject variability in  
2 pain ratings. **A:** For each subject, trials were sorted by reported pain intensity. Median-split low-  
3 pain and high-pain trials (n=20 each) are displayed in blue and orange, respectively. **B:** Time-  
4 domain analysis. Group-level LEP waveforms: N2-wave and P2-wave amplitudes are  
5 significantly larger in high-pain than in low-pain trials ( $p < 0.001$  for both waves; paired-sample t-  
6 test). **C:** Time-frequency analysis. Group-level TFDs: Magnitudes of 'LEP', ' $\alpha$ -ERD', and ' $\gamma$ -ERS'  
7 are significantly larger in high-pain than in low-pain trials ( $p < 0.001$  for all features; paired-  
8 sample t-test). Similar results were obtained when pain ratings were tripartite in low-third,  
9 middle-third, and high-third trials. **D:** Participants were sorted by their mean self-reported pain  
10 ratings across all trials. Median split low-pain and high-pain subjects (n=48 each) are displayed  
11 in green and purple, respectively. **E:** Time-domain analysis. Group-level LEPs: N2-wave and P2-  
12 wave amplitudes are virtually identical in low-pain and high-pain subjects ( $p > 0.05$  for both  
13 waves; independent-sample t-test). **F:** Time-frequency analysis. Group-level TFDs: While the  
14 magnitudes of 'LEP' and ' $\alpha$ -ERD' are not significantly different between subgroups ( $p > 0.05$  for  
15 both features; independent-sample t-test), ' $\gamma$ -ERS' is significantly larger in high-pain than in low-  
16 pain subjects ( $p = 0.01$ ; independent-sample t-test). Similar results were obtained when subjective  
17 pain ratings were tripartite in low-third, middle-third, and high-third subjects.  
18

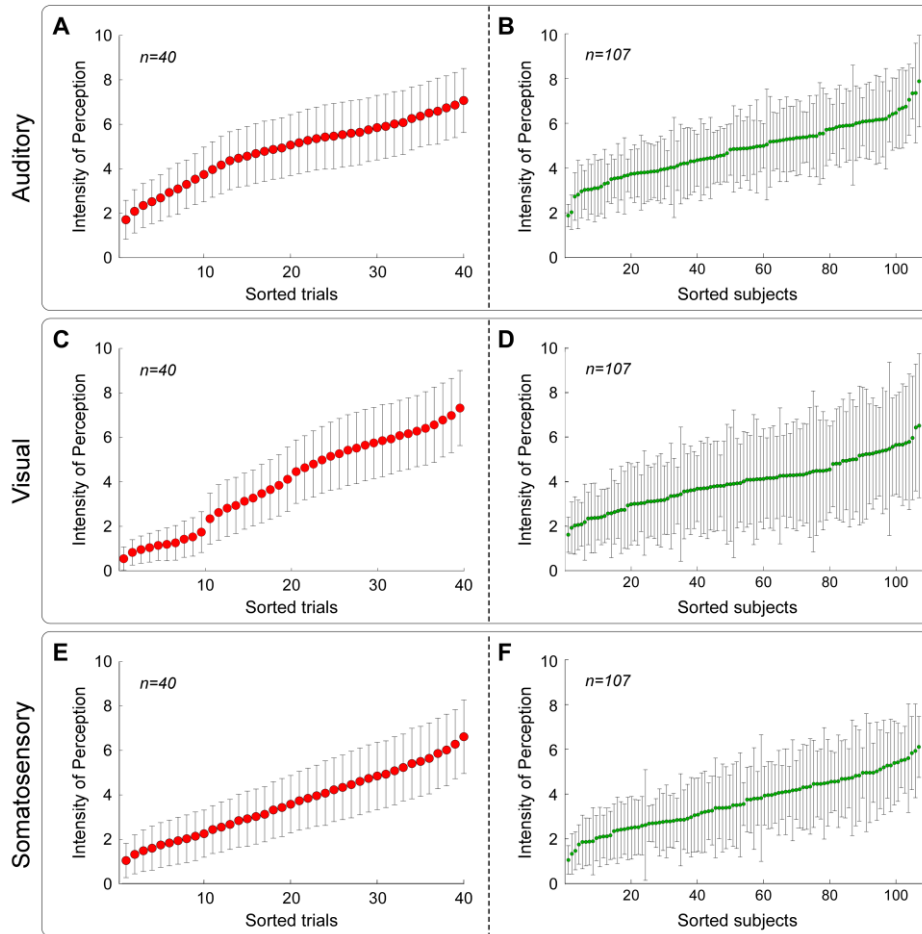

1

2

3 **Figure S2.** Within-subject and between-subject variability in perception of auditory, visual, and

4 non-nociceptive somatosensory stimuli. **A, C, E:** For each subject, trials were sorted by

5 perceived intensity ratings. **B, D, F:** Participants were sorted by their mean perceived intensity

6 ratings across all trials.

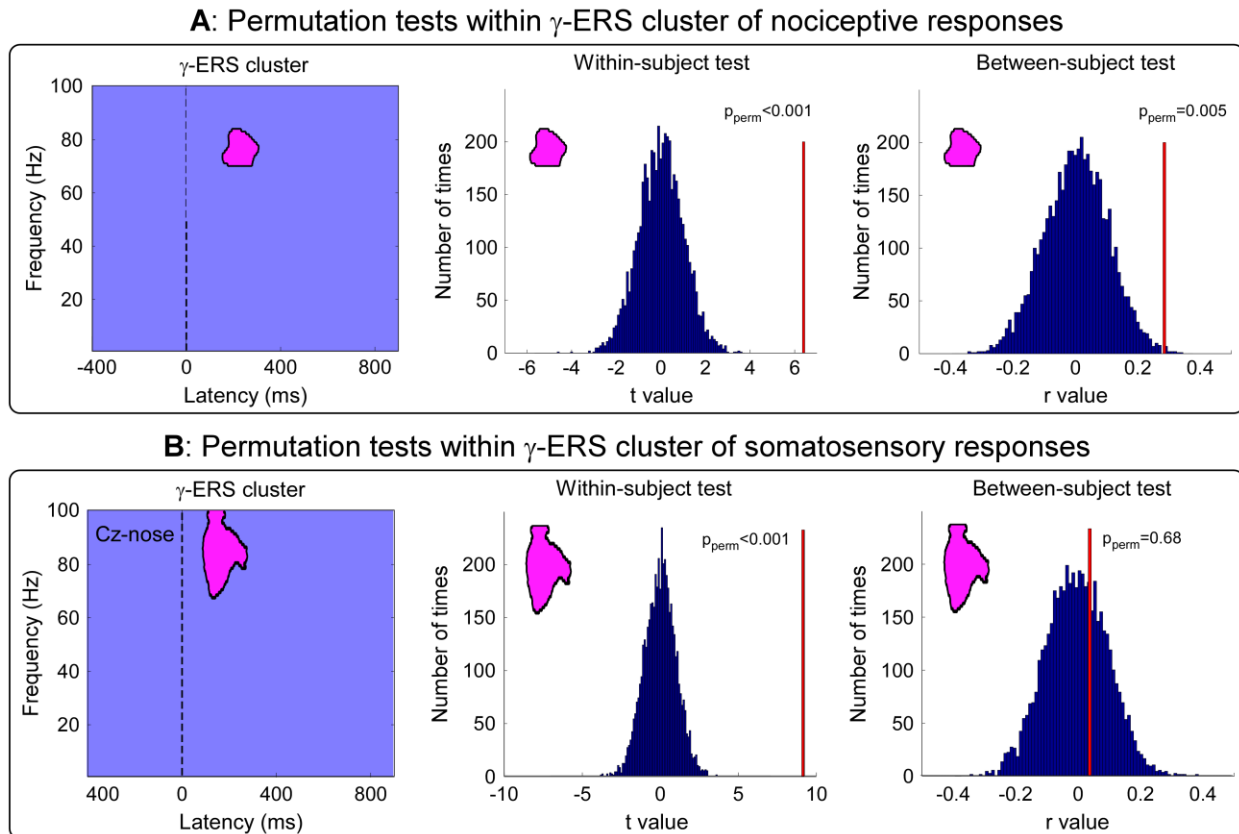

1  
2  
3  
4  
5  
6  
7  
8  
9  
10  
11

**Figure S3.** Relationship between subjective intensity ratings and ' $\gamma$ -ERS' elicited by nociceptive and non-nociceptive somatosensory stimuli. **A:** The ' $\gamma$ -ERS' cluster elicited by nociceptive stimuli reflected both within-subject variability in pain ratings (t-value, vertical red line in the middle plot;  $p < 0.001$ ; 5,000 permutations) and between-subject variability in pain ratings (r-value, vertical red line in the right plot;  $p = 0.005$ ; 5,000 permutations). **B:** The ' $\gamma$ -ERS' elicited by non-nociceptive somatosensory stimuli only reflected within-subject perceptual variability (t-value, vertical red line in the middle plot;  $p < 0.001$ ; 5,000 permutations), but not between-subject perceptual variability (r-value, vertical red line in the right plot;  $p = 0.68$ ; 5,000 permutations).

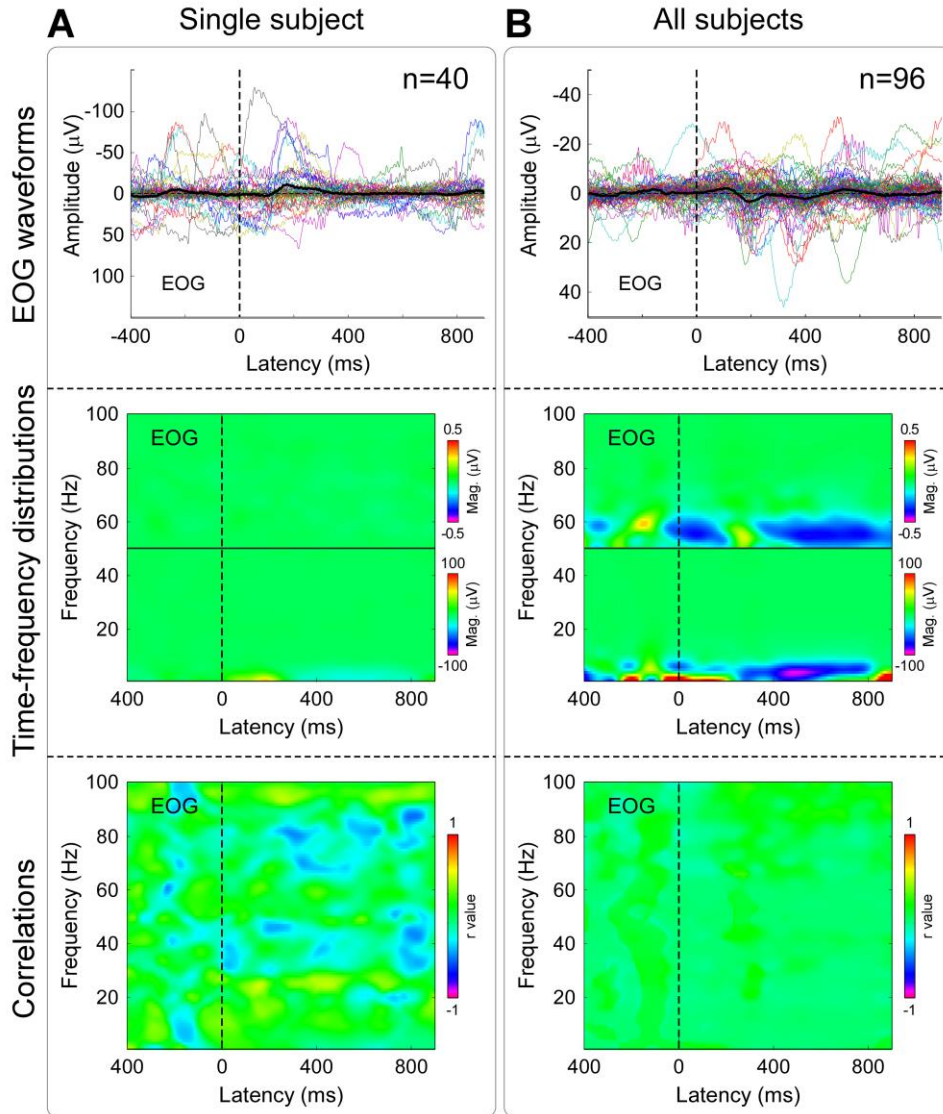

1  
2

3 **Figure S4. EOG signals recorded from a subject with particularly strong ocular movements**  
 4 **and eye blinks (A) and from all subjects (B).** Single-trial (A) and single-subject (B) EOG  
 5 waveforms in the time domain are coloured and superimposed (first row). Across-trial (A) and  
 6 across-subject (B) averages are displayed in black. The time-frequency representation of single  
 7 trials (A) and of single trials from all subjects (B) are displayed in the second row. Note the lack  
 8 of a clear time-locked ‘ $\gamma$ -ERS’ response. Note also how time-frequency EOG signals did not  
 9 reflected either within-subject or between-subject variability in pain ratings (third row).

10

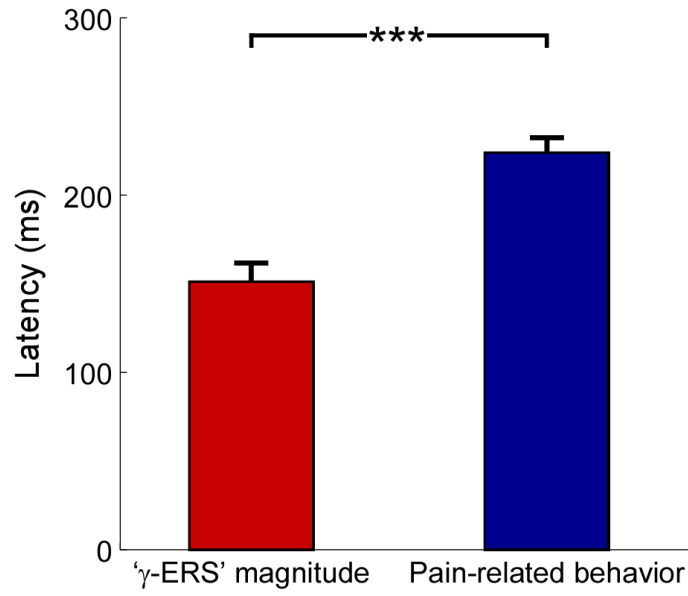

1  
2  
3  
4  
5  
6  
7  
8  
9

**Figure S5. Comparison of the latency of ' $\gamma$ -ERS' magnitude and pain-related behavior.** Single-subject latencies of ' $\gamma$ -ERS' magnitude were significantly shorter than those of pain-related behavior (151±11 ms vs. 224±8 ms;  $p < 0.001$ , paired-sample t test). This result indicates that the early ' $\gamma$ -ERS' recorded in rats does not reflect muscle activity. Data were collected from 5 adult male rats in a new experiment, in which the operating signals of the camera and the onset of the laser pulses were sampled synchronously with the EEG data.

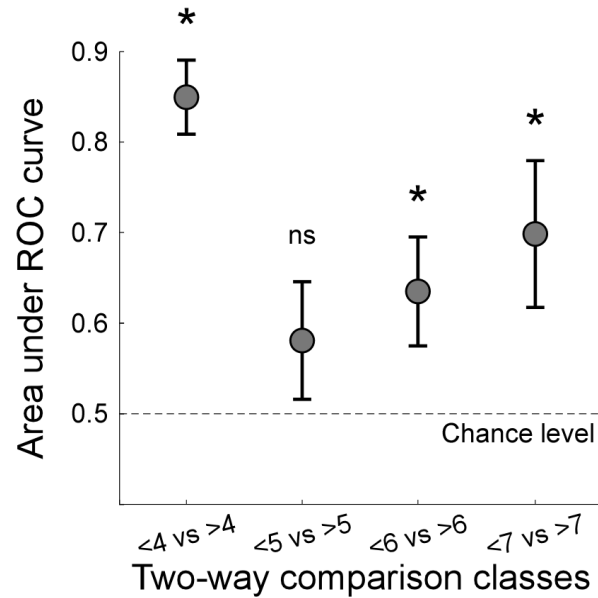

1  
2  
3  
4  
5  
6  
7  
8  
9  
10  
11  
12

**Figure S6. Receiver operating characteristic (ROC) analysis quantifying the ability of ‘ $\gamma$ -ERS’ to discriminate between individual human participants with different pain sensitivity.** ROC analysis showed that ‘ $\gamma$ -ERS’ amplitude effectively discriminates individuals participants who provided ratings below vs above the pain threshold (i.e., 4), as well as individual participants who reported low and high (e.g., participants who provided ratings below vs above 7). The graph reports the mean discrimination between all pairs of two individual participants with pain ratings lower than vs. higher than 4, 5, 6, and 7. Discrimination was significantly greater than chance (i.e., 0.5) in all conditions except when discriminating participants with a pain ratings lower vs. higher than 5. Error bars show the standard error across subjects.

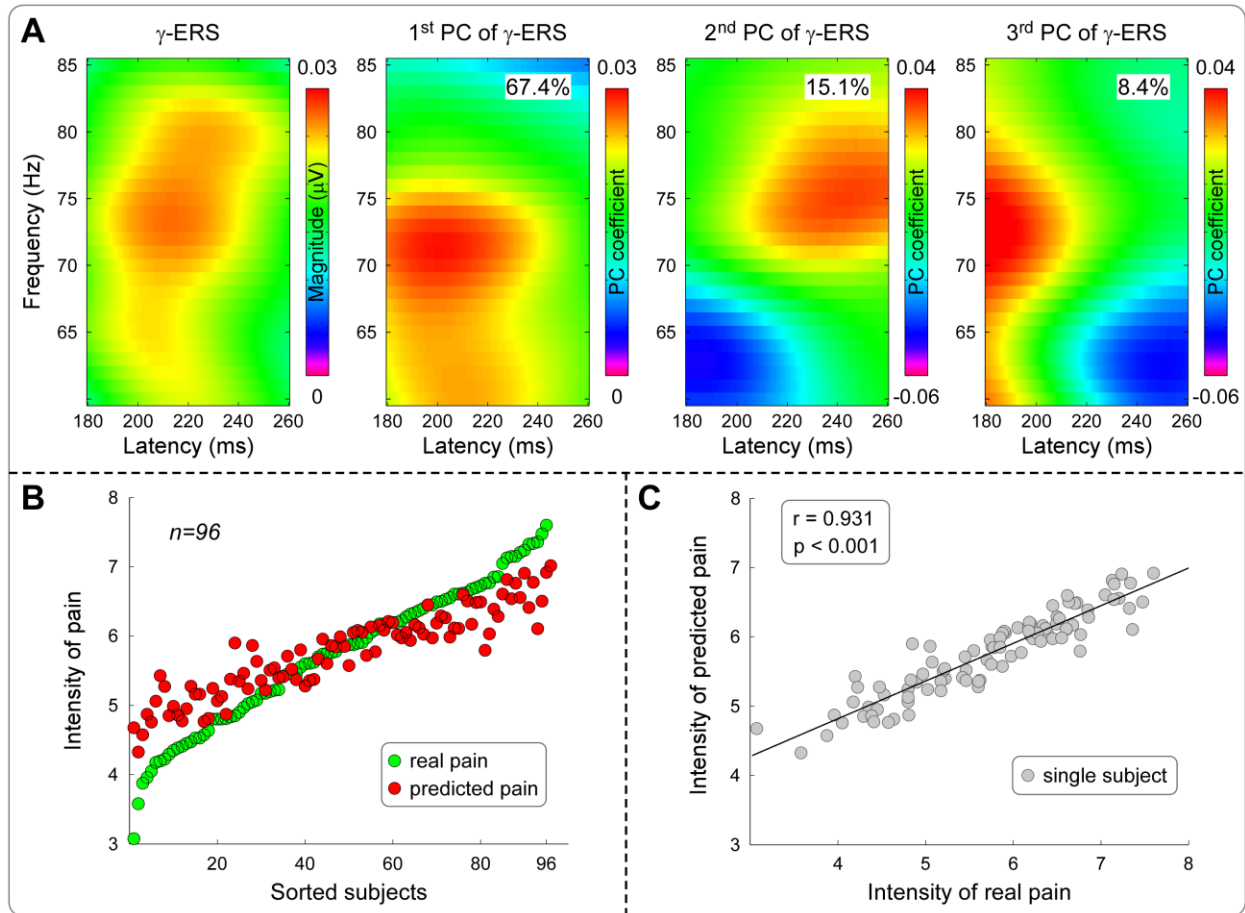

1  
2  
3  
4  
5  
6  
7  
8  
9  
10

**Figure S7. Experiment 1: Prediction of individual pain sensitivity using the ‘ $\gamma$ -ERS’ response.**  
**A:** Time-frequency distribution (TFD) of the ‘ $\gamma$ -ERS’ response (180-260 ms, 60-85 Hz) and of its first three PCs (which explained 67.4%, 15.1%, and 8.4% of the variance of ‘ $\gamma$ -ERS’, respectively).  
**B:** A random forest regression model based on the first 20 PCs achieved accurate prediction of individual pain sensitivity. Subjects are sorted by reported pain intensity (green). Corresponding predicted pain intensity is superimposed (red). **C:** Importantly, real and predicted pain intensity were highly correlated across subjects ( $r=0.93$ ,  $p<0.001$ ; each gray dot represents a single subject).

**Table S1.** Correlations between subjective ratings of perception intensity and brain responses evoked by auditory, visual, and non-nociceptive somatosensory stimuli. Data from Experiment 2. Significant correlations that survived FDR correction are marked in bold.

|                  | Auditory                   |                             | Visual                     |                             | Non-nociceptive somatosensory |                            |
|------------------|----------------------------|-----------------------------|----------------------------|-----------------------------|-------------------------------|----------------------------|
|                  | Within-subject correlation | Between-subject correlation | Within-subject correlation | Between-subject correlation | Within-subject correlation    | Within-subject correlation |
| N1 wave          | -0.24 ± 0.18               | -0.11 (p=0.27)              | -0.44 ± 0.24               | -0.08 (p=0.41)              | -0.31 ± 0.17                  | -0.17 (p=0.08)             |
| P2 wave          | 0.20 ± 0.18                | 0.01 (p=0.93)               | 0.33 ± 0.20                | 0.13 (p=0.18)               | 0.32 ± 0.18                   | 0.04 (p=0.68)              |
| ‘ERP’ magnitude  | 0.20 ± 0.17                | 0.07 (p=0.46)               | 0.34 ± 0.18                | 0.13 (p=0.19)               | 0.43 ± 0.17                   | 0.16 (p=0.12)              |
| ‘ $\alpha$ -ERD’ | -0.04 ± 0.16               | -0.002 (p=0.99)             | 0.02 ± 0.16                | 0.12 (p=0.24)               | 0.02 ± 0.16                   | 0.08 (p=0.44)              |
| ‘ $\gamma$ -ERS’ | 0.02 ± 0.16                | -0.06 (p=0.52)              | 0.01 ± 0.20                | 0.13 (p=0.19)               | 0.11 ± 0.17                   | -0.05 (p=0.63)             |



**Table S2.** Laser-evoked EEG responses in different trial categories (low-pain and high-pain trials) and subject categories (low-pain and high-pain subjects). Data from Experiment 1.

|                                              | Low-pain subjects |                   | High-pain subjects |                   |
|----------------------------------------------|-------------------|-------------------|--------------------|-------------------|
|                                              | Low-pain trials   | High-pain trials  | Low-pain trials    | High-pain trials  |
| Pain ratings                                 | $3.1 \pm 0.9$     | $6.7 \pm 0.8$     | $5.0 \pm 0.8$      | $8.2 \pm 0.6$     |
| N1 wave latency (ms)                         | $174 \pm 32$      | $159 \pm 27$      | $172 \pm 23$       | $162 \pm 18$      |
| N1 wave amplitude ( $\mu\text{V}$ )          | $-2.2 \pm 2.5$    | $-8.1 \pm 7.3$    | $-1.8 \pm 2.2$     | $-7.0 \pm 5.5$    |
| N2 wave latency (ms)                         | $233 \pm 43$      | $203 \pm 26$      | $224 \pm 32$       | $198 \pm 20$      |
| N2 wave amplitude ( $\mu\text{V}$ )          | $-10.5 \pm 7.2$   | $-32.0 \pm 15.5$  | $-11.2 \pm 9.2$    | $-29.7 \pm 13.8$  |
| P2 wave latency (ms)                         | $361 \pm 37$      | $343 \pm 35$      | $362 \pm 43$       | $346 \pm 32$      |
| P2 wave amplitude ( $\mu\text{V}$ )          | $7.7 \pm 4.6$     | $23.9 \pm 10.1$   | $9.7 \pm 6.3$      | $23.4 \pm 9.4$    |
| 'LEP' magnitude ( $\mu\text{V}$ )            | $5.7 \pm 5.1$     | $20.9 \pm 13.9$   | $6.4 \pm 5.8$      | $18.3 \pm 11.0$   |
| ' $\alpha$ -ERD' magnitude ( $\mu\text{V}$ ) | $0.24 \pm 1.49$   | $-0.19 \pm 1.81$  | $-0.15 \pm 2.43$   | $-0.61 \pm 4.27$  |
| ' $\gamma$ -ERS' magnitude ( $\mu\text{V}$ ) | $0.000 \pm 0.021$ | $0.022 \pm 0.031$ | $0.016 \pm 0.053$  | $0.048 \pm 0.077$ |

**Table S3.** Two-way mixed-design ANOVA to assess the effect of trial category (low-pain vs. high-pain trials) and subject category (low-pain vs. high-pain subjects) on laser-evoked EEG responses. Data from Experiment 1.

|                            | Main effects   |                  |                  |                  |              |                  | Interaction |         |                  |
|----------------------------|----------------|------------------|------------------|------------------|--------------|------------------|-------------|---------|------------------|
|                            | Trial category |                  |                  | Subject category |              |                  | F value     | p value | Partial $\eta^2$ |
|                            | F value        | p value          | Partial $\eta^2$ | F value          | p value      | Partial $\eta^2$ |             |         |                  |
| N1 wave latency            | 11.166         | <b>0.001</b>     | 0.056            | 0.014            | 0.905        | < 0.001          | 0.628       | 0.429   | 0.003            |
| N1 wave amplitude          | 63.528         | <b>&lt;0.001</b> | 0.253            | 1.128            | 0.290        | 0.006            | 0.201       | 0.654   | 0.001            |
| N2 wave latency            | 36.837         | <b>&lt;0.001</b> | 0.164            | 2.255            | 0.135        | 0.012            | 0.189       | 0.664   | 0.001            |
| N2 wave amplitude          | 135.529        | <b>&lt;0.001</b> | 0.419            | 0.229            | 0.633        | 0.001            | 0.762       | 0.384   | 0.004            |
| P2 wave latency            | 10.285         | <b>0.002</b>     | 0.052            | 0.106            | 0.745        | 0.001            | 0.063       | 0.802   | < 0.001          |
| P2 wave amplitude          | 169.418        | <b>&lt;0.001</b> | 0.474            | 0.454            | 0.501        | 0.002            | 1.149       | 0.285   | 0.006            |
| 'LEP' magnitude            | 92.150         | <b>&lt;0.001</b> | 0.329            | 0.439            | 0.508        | 0.002            | 1.355       | 0.246   | 0.007            |
| ' $\alpha$ -ERD' magnitude | 1.274          | 0.261            | 0.007            | 1.081            | 0.300        | 0.006            | 0.003       | 0.960   | < 0.001          |
| ' $\gamma$ -ERS' magnitude | 13.745         | <b>&lt;0.001</b> | 0.068            | 8.252            | <b>0.005</b> | 0.042            | 0.511       | 0.476   | 0.003            |

**Table S4.** Three-way mixed-design ANOVA to assess the effect of trial category (low-pain vs. high-pain trials), feature category ('LEP', ' $\alpha$ -ERD', and ' $\gamma$ -ERS'), and subject category (low-pain vs. high-pain subjects) on normalized magnitudes of laser-evoked EEG responses. Data from Experiment 1.

| Three-way mixed-design ANOVA                                       | F value | p value          | Partial $\eta^2$ |
|--------------------------------------------------------------------|---------|------------------|------------------|
| Trial category                                                     | 41.455  | <b>&lt;0.001</b> | 0.068            |
| Feature category                                                   | <0.001  | 1.000            | <0.001           |
| Subject category                                                   | 0.519   | 0.472            | 0.001            |
| Trial category $\times$ feature category                           | 23.932  | <b>&lt;0.001</b> | 0.078            |
| Trial category $\times$ subject category                           | 0.042   | 0.838            | <0.001           |
| Feature category $\times$ subject category                         | 4.882   | <b>0.008</b>     | 0.017            |
| Trial category $\times$ feature category $\times$ subject category | 0.784   | 0.457            | 0.003            |
| Post hoc test (LSD) for feature category $\times$ subject category |         |                  |                  |
| 'LEP' magnitude                                                    | 0.287   | 0.593            | 0.002            |
| ' $\alpha$ -ERD' magnitude                                         | 1.085   | 0.299            | 0.006            |
| ' $\gamma$ -ERS' magnitude                                         | 7.751   | <b>0.006</b>     | 0.039            |

## 1 **References**

- 2 1. Hu L, Xiao P, Zhang ZG, Mouraux A, & Iannetti GD (2014) Single-trial time-frequency  
3 analysis of electrocortical signals: baseline correction and beyond. *Neuroimage* 84:876-  
4 887.
- 5 2. Durka PJ, Zygierewicz J, Klekowicz H, Ginter J, & Blinowska KJ (2004) On the statistical  
6 significance of event-related EEG desynchronization and synchronization in the time-  
7 frequency plane. *IEEE Trans Biomed Eng* 51(7):1167-1175.
- 8 3. Benjamini Y & Hochberg Y (1995) Controlling the False Discovery Rate - a Practical and  
9 Powerful Approach to Multiple Testing. *J Roy Stat Soc B Met* 57(1):289-300.
- 10 4. Maris E & Oostenveld R (2007) Nonparametric statistical testing of EEG- and MEG-data.  
11 *J Neurosci Methods* 164(1):177-190.
- 12 5. Zhang ZG, Hu L, Hung YS, Mouraux A, & Iannetti GD (2012) Gamma-band oscillations  
13 in the primary somatosensory cortex--a direct and obligatory correlate of subjective pain  
14 intensity. *J Neurosci* 32(22):7429-7438.
- 15 6. Hu L, Mouraux A, Hu Y, & Iannetti GD (2010) A novel approach for enhancing the signal-  
16 to-noise ratio and detecting automatically event-related potentials (ERPs) in single trials.  
17 *Neuroimage* 50(1):99-111.
- 18 7. Mouraux A, Guerit JM, & Plaghki L (2003) Non-phase locked electroencephalogram (EEG)  
19 responses to CO2 laser skin stimulations may reflect central interactions between A partial  
20 partial differential- and C-fibre afferent volleys. *Clin Neurophysiol* 114(4):710-722.
- 21 8. Gross J, Schnitzler A, Timmermann L, & Ploner M (2007) Gamma oscillations in human  
22 primary somatosensory cortex reflect pain perception. *Plos Biology* 5(5):1168-1173.
- 23 9. Mitsis GD, Iannetti GD, Smart TS, Tracey I, & Wise RG (2008) Regions of interest analysis  
24 in pharmacological fMRI: How do the definition criteria influence the inferred result?  
25 *Neuroimage* 40(1):121-132.
